# Supplementary material for: Comparison of the genomes of two Xanthomonas pathogens with differing host specificities
Source: Springer Nature journal article supplement (doi:10.1038/417459a), 2002-05-23
Supplement: 41586_2002_BF417459a_MOESM1_ESM.pdf [file 41586_2002_BF417459a_MOESM1_ESM.pdf]

**Table 1: Cell Wall Degrading Enzymes: Orfs (Open Reading Frame) Present in *Xcc* and *Xac* Genomes**

|                                       | Orf Number                                      |                                             |
|---------------------------------------|-------------------------------------------------|---------------------------------------------|
|                                       | <i>Xcc</i>                                      | <i>Xac</i>                                  |
| <b>Pectnolytic Enzymes</b>            |                                                 |                                             |
| <b>Polygalacturonases</b>             | XCC2266<br>XCC3459                              | XAC0661<br>XAC2374                          |
| <b>Pectate lyases</b>                 | XCC0122*<br>XCC0644<br>XCC0645*<br>XCC2815<br>- | -<br>XAC2986<br>-<br>XAC3562<br>XAC2373*(d) |
| <b>Pectin methylesterases</b>         | XCC0121*<br>XCC2265*                            | -<br>-                                      |
| <b>Rhamnogalacturonan acetylerase</b> | XCC0154                                         | XAC0171                                     |
| <b>Rhamnogalacturonases</b>           | XCC3377*(t)<br>XCC3378*(t)<br>XCC3379*(t)       | XAC3505*<br>-<br>-                          |
| <b>Total number of integral Orfs</b>  | <b>09</b>                                       | <b>06</b>                                   |

(d) degenerated orfs

(t) truncated orfs

\* : Orf exclusive to each genome

| <b>Cellulolytic Enzymes</b> | <i>Xcc</i>                                                                                                       | <i>Xac</i>                                                                                                                        |
|-----------------------------|------------------------------------------------------------------------------------------------------------------|-----------------------------------------------------------------------------------------------------------------------------------|
| <b>Cellulases</b>           | XCC0026<br>XCC0027<br>XCC0028<br>XCC1752<br>XCC2387<br>XCC3380*<br>-<br>XCC3381<br>XCC3521<br>XCC3535*<br>-<br>- | XAC0028<br>XAC0029<br>XAC0030<br>XAC0612<br>XAC1770<br>-<br>XAC2522<br>XAC3506*(t)<br>XAC3507 (t)<br>-<br>XAC3516*<br>XAC0346*(d) |
| <b>Cellobiosidases</b>      | XCC3160*<br>XCC3534*                                                                                             | -<br>-                                                                                                                            |
| <b>Beta-glucosidases</b>    | XCC1090*<br>XCC1250*<br>XCC1775<br>XCC2892<br>XCC4106<br>XCC1404<br>XCC3814                                      | -<br>-<br>XAC1793<br>XAC3076<br>XAC4231<br>XAC1448<br>XAC3869                                                                     |

|                                      |           |           |
|--------------------------------------|-----------|-----------|
| <b>Total number of integral Orfs</b> | <b>18</b> | <b>12</b> |
|--------------------------------------|-----------|-----------|

(d) degenerated orfs

(t) truncated orfs

\*: Orf exclusive to each genome

| <b>Hemicellulolytic Enzymes</b>      | <b><i>Xcc</i></b> | <b><i>Xac</i></b> |
|--------------------------------------|-------------------|-------------------|
| <b>Xylanases</b>                     | XCC0144           | XAC0160           |
|                                      | -                 | XAC0933*(t)       |
|                                      | -                 | XAC0934*(t)       |
|                                      | -                 | XAC4252*          |
|                                      | XCC0857           | XAC4254           |
|                                      | XCC3038           | XAC4249           |
|                                      | XCC4115*          | -                 |
| XCC4118*                             | -                 |                   |
| <b>Xylosidases/arabinosidases</b>    | XCC0149           | XAC0165           |
|                                      | XCC1178           | XAC1275           |
|                                      | XCC1755           | XAC1773           |
|                                      | XCC2398           | XAC2533           |
|                                      | XCC3975           | XAC4058           |
|                                      | XCC4064           | XAC4183           |
|                                      | XCC4105           | XAC4230           |
| XCC4122                              | XAC4258           |                   |
| <b>Total number of integral Orfs</b> | <b>13</b>         | <b>12</b>         |

(d) degenerated orfs

(t) truncated orfs

\*: Orf exclusive to each genome

### Cell Wall Degrading Enzymes: Summary

| <b>Enzyme Activity</b>  | <b><i>Xcc</i></b> | <b><i>Xac</i></b> | <b><i>Xcc/Xac</i></b> |
|-------------------------|-------------------|-------------------|-----------------------|
| <b>Pectinolytic</b>     | 9                 | 6                 | 1.50                  |
| <b>Cellulolytic</b>     | 18                | 12                | 1.50                  |
| <b>Hemicellulolytic</b> | 13                | 12                | 1.08                  |
| <b>Total</b>            | <b>40</b>         | <b>30</b>         | <b>1.33</b>           |

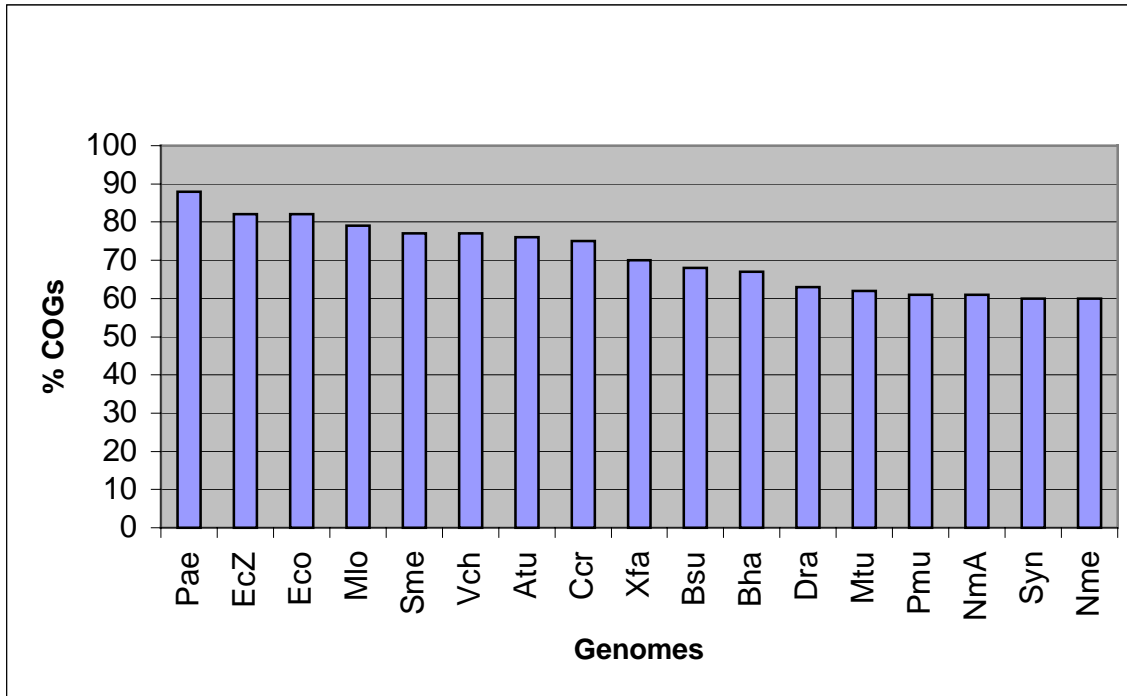

Figure 2: Histogram of COG co-occurrences. Each bar corresponds to an organism (identified by a 3-letter acronym). For each such organism the height of the bar corresponds to the percentage of all *Xanthomonas axonopodis* pv *citri* COGs which are shared with that organism. Pae, *Pseudomonas aeruginosa*; EcZ, *Escherichia coli*O157; Eco, *Escherichia coli* K12; Mlo, *Mesorhizobium loti*; Sme, *Sinorhizobium meliloti*; Vch, *Vibrio cholerae*; Atu, *Agrobacterium tumefaciens* C58; Ccr, *Caulobacter crescentus*; Xfa, *Xylella fastidiosa*; Bsu, *Bacillus subtilis*; Bha, *Bacillus halodurans*; Dra, *Deinococcus radiodurans*; Mtu, *Mycobacterium tuberculosis*; Pmu, *Pasteurella multocida*; NmA, *Neisseria meningitidis* Z2491; Syn, *Synechocystis*; Nme, *Neisseria meningitidis* MC58.
